# Supplementary material
Source: PubMed Central journal article supplement (PMC2789631)

Supplemental Figure S2

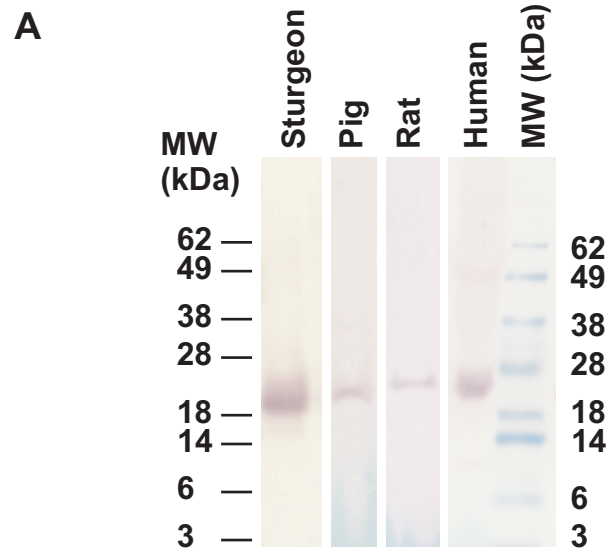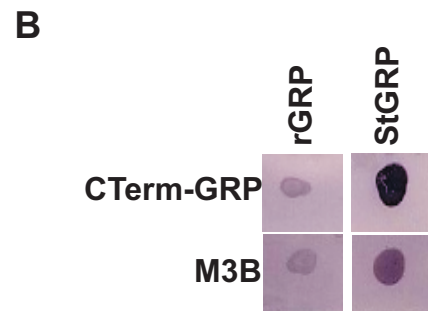

Supplement: ajpath.2009.090542_2.pdf [file ajpath.2009.090542_2.pdf]
